# Supplementary material
Source: PubMed Central journal article supplement (PMC3993573)
Supplement: MCB.00965-13_zmb999100357so1.pdf [file MCB.00965-13_zmb999100357so1.pdf]

**Legend to Supplemental Table 1.** Detailed information on DLL1 phosphopeptides detected by mass spectrometry.
