# Supplementary material
Source: PubMed Central journal article supplement (PMC3993573)
Supplement: MCB.00965-13_zmb999100357so2.pdf [file MCB.00965-13_zmb999100357so2.pdf]

| Position | Peptide IDs | Mod. Peptide IDs | Best Localization | Best Localization | Proteins       | Protein    | Protein Descriptive Uniprot | Localization Prob. | Number of Phosph. | Amino Acid | Sequence Window | Moifs         | Best Motif | PEP         | Masscot Score | Modified Sequen | Phospho (STY) P | Position in peptide | Charge | m/z       | Mass Error (ppm) | Intensity |
|----------|-------------|------------------|-------------------|-------------------|----------------|------------|-----------------------------|--------------------|-------------------|------------|-----------------|---------------|------------|-------------|---------------|-----------------|-----------------|---------------------|--------|-----------|------------------|-----------|
| 638      | 1299:1352   | 1310:1397        | 1783              | 2103              | C61483         | C61483     | >C61483 atDL1 MCLUSE Delta  | 1                  | 1                 | T          | FKVRYPTVDYK     | CAMK2         | CAMK2      | 1.08E-08    | 34.1          | YFTRHVDYNA      | YFTI11VDYHLVR   | 3                   | 2      | 660.30521 | 1.3071           | 15747000  |
| 693      | 177         | 197              | 290               | 300               | IP00121340:IPD | IP00121340 | Delta-like protein          | 0.999537           | 2                 | S          | DKRRFESVYSTI    | CAMK2-PKA-PKA | PKA-AKT    | 0.000514298 | 24.43         | RFESLHLYSLS     | RPESSIVYSSG     | 4                   | 7      | 657.20226 | -0.05347         | 68731     |
| 696      | 177         | 197              | 290               | 300               | IP00121340:IPD | IP00121340 | Delta-like protein          | 0.9227             | 2                 | S          | RRESVYSTKDT     | CK1           | CK1        | 0.000514298 | 24.43         | RRESLHLYSLS     | RPESSIVYSSG     | 4                   | 7      | 657.20226 | -0.05347         | 68731     |

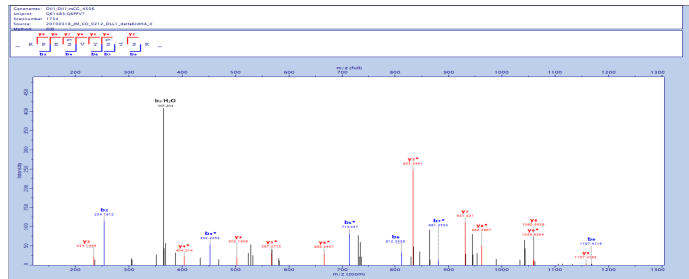

**RPEVYSTK**  
 User AA Formula 1: C2 H3 N1 O1  
 Elemental Composition: C49 H83 N14 O24 P2  
 MH+ (avi) MH+ (monol)  
 1314.2323 1313.5174  
 [-] Main Sequence Ions

| b   | y   |
|-----|-----|
| --- | 1 R |
| --- | 2 P |
| --- | 3 E |
| --- | 4 S |
| --- | 5 V |
| --- | 6 Y |
| --- | 7 T |
| --- | 8 S |
| --- | 9 K |
| --- | 10  |

**[-] All Sequence Ions**

| MH  | Low Mass | 70.0651  | 70.0651 | 102.055 | --- <th>72.0808</th> <th>136.0757</th> <th>--- <th>74.06</th> <th>60.0444</th> <th>84.0808</th> </th> | 72.0808 | 136.0757 | --- <th>74.06</th> <th>60.0444</th> <th>84.0808</th> | 74.06 | 60.0444 | 84.0808  |
|-----|----------|----------|---------|---------|-------------------------------------------------------------------------------------------------------|---------|----------|------------------------------------------------------|-------|---------|----------|
| --- | ---      | 87.0917  | 126.055 | ---     | ---                                                                                                   | ---     | ---      | ---                                                  | ---   | ---     | 101.1073 |
| --- | ---      | 100.0869 | ---     | ---     | ---                                                                                                   | ---     | ---      | ---                                                  | ---   | ---     | 129.1022 |
| --- | ---      | 112.0899 | ---     | ---     | ---                                                                                                   | ---     | ---      | ---                                                  | ---   | ---     | 126.0913 |

**N-terminal**

| a   | b   | b+H2O |
|-----|-----|-------|
| --- | --- | ---   |
| --- | --- | ---   |
| --- | --- | ---   |

**C-terminal**

| y   |
|-----|
| --- |
| --- |
| --- |
| --- |
| --- |
| --- |
| --- |
| --- |
| --- |
| --- |
| --- |

**[-] Theoretical Peak Table**

| 60.0444 S  | 102.055 E   | 254.1612 b2 | 665.2542 v5  | 1080.3799 b8     |
|------------|-------------|-------------|--------------|------------------|
| 70.0651 R  | 112.0899 R  | 335.1925 v3 | 764.3226 v6  | 1098.3904 b8+H2O |
| 70.0651 P  | 126.055 P   | 385.2088 a3 | 784.3389 a6  | 1139.417 a9      |
| 72.0808 V  | 126.0913 K  | 383.2037 b3 | 812.3338 b6  | 1157.4163 v9     |
| 74.06 T    | 126.1022 K  | 502.1909 v4 | 951.3373 a7  | 1167.4119 b6     |
| 84.0808 K  | 126.0757 Y  | 822.2072 a4 | 951.3373 a7  | 1185.4225 b8+H2O |
| 87.0917 R  | 147.1128 Y1 | 850.2021 b4 | 979.3322 b7  | 1313.5174 MH     |
| 100.0869 R | 226.1662 a2 | 621.2756 a5 | 1052.385 a8  | ---              |
| 101.1073 K | 234.1448 v2 | 649.2705 b5 | 1060.3636 v6 | ---              |

**MS-Product in ProteinProspector 5.10.6 Basic**

**all Ions**

**RPEVYSTK**  
 User AA Formula 1: C2 H3 N1 O1  
 Elemental Composition: C49 H83 N14 O24 P2  
 MH+ (avi) MH+ (monol)  
 1314.2323 1313.5174  
 [-] Main Sequence Ions

| b   | y   |
|-----|-----|
| --- | 1 R |
| --- | 2 P |
| --- | 3 E |
| --- | 4 S |
| --- | 5 V |
| --- | 6 Y |
| --- | 7 T |
| --- | 8 S |
| --- | 9 K |
| --- | 10  |

**[-] All Sequence Ions**

| MH  | MH+H2O | MH-NH3 | Low Mass | 70.0651  | 70.0651 | 102.055 | --- <th>72.0808</th> <th>136.0757</th> <th>--- <th>74.06</th> <th>60.0444</th> <th>84.0808</th> </th> | 72.0808 | 136.0757 | --- <th>74.06</th> <th>60.0444</th> <th>84.0808</th> | 74.06 | 60.0444 | 84.0808  |
|-----|--------|--------|----------|----------|---------|---------|-------------------------------------------------------------------------------------------------------|---------|----------|------------------------------------------------------|-------|---------|----------|
| --- | ---    | ---    | ---      | 87.0917  | 126.055 | ---     | ---                                                                                                   | ---     | ---      | ---                                                  | ---   | ---     | 101.1073 |
| --- | ---    | ---    | ---      | 100.0869 | ---     | ---     | ---                                                                                                   | ---     | ---      | ---                                                  | ---   | ---     | 129.1022 |
| --- | ---    | ---    | ---      | 112.0899 | ---     | ---     | ---                                                                                                   | ---     | ---      | ---                                                  | ---   | ---     | 126.0913 |

**N-terminal**

| a-NH3 | b-NH3 | b+H2O |
|-------|-------|-------|
| ---   | ---   | ---   |
| ---   | ---   | ---   |
| ---   | ---   | ---   |

**C-terminal**

| y-NH3 | y+H2O |
|-------|-------|
| ---   | ---   |
| ---   | ---   |
| ---   | ---   |
| ---   | ---   |
| ---   | ---   |
| ---   | ---   |
| ---   | ---   |
| ---   | ---   |
| ---   | ---   |
| ---   | ---   |
| ---   | ---   |

**[-] Theoretical Peak Table**

| 60.0444 S       | 208.1397 a2-NH3                                                                         | 502.1909 v4     | 767.3124 a8-NH3  | 1060.3636 v8     |
|-----------------|-----------------------------------------------------------------------------------------|-----------------|------------------|------------------|
| 70.0651 R       | 216.1343 b2+H2O <td>505.1809 a4-NH3</td> <td>784.3389 a6</td> <td>1062.3698 b8+H2O</td> | 505.1809 a4-NH3 | 784.3389 a6      | 1062.3698 b8+H2O |
| 70.0651 P       | 217.1183 v2-NH3                                                                         | 522.2072 a7     | 794.3233 b8+H2O  | 1063.3533 b8-NH3 |
| 72.0808 V       | 226.1662 a2                                                                             | 532.1915 b4+H2O | 795.3073 b6-NH3  | 1080.3799 b8     |
| 74.06 T         | 234.1448 v2                                                                             | 533.1756 b4-NH3 | 812.3338 b6      | 1098.3904 b8+H2O |
| 84.0808 K       | 237.1346 b2-NH3                                                                         | 550.2021 b4     | 913.3104 v7+H2O  | 1122.3904 a8-NH3 |
| 87.0917 R       | 254.1612 b2                                                                             | 604.2491 a8-NH3 | 914.2944 v7-NH3  | 1139.4059 v9+H2O |
| 100.0869 R      | 317.1819 v3+H2O                                                                         | 621.2756 a5     | 931.321 v7       | 1139.417 a9      |
| 101.1073 K      | 318.166 v3-NH3                                                                          | 631.26 b5+H2O   | 934.3107 a7-NH3  | 1140.3896 v9-NH3 |
| 102.055 E       | 335.1925 v3                                                                             | 632.244 b5-NH3  | 951.3373 a7      | 1149.4013 b9+H2O |
| 112.0899 R      | 338.1823 a3-NH3                                                                         | 647.2436 v5+H2O | 961.3216 b7+H2O  | 1150.3854 b9-NH3 |
| 126.055 P       | 355.2088 a3                                                                             | 648.2276 v5-NH3 | 962.3057 b7-NH3  | 1167.4119 b9     |
| 126.0913 K      | 365.1932 b3+H2O                                                                         | 649.2705 b5     | 979.3322 b7      | 1167.4119 b9     |
| 126.1022 K      | 366.1772 b3-NH3                                                                         | 660.2542 v5     | 1035.3584 a8-NH3 | 1185.4225 b9+H2O |
| 130.0863 Y1-NH3 | 383.2037 b3                                                                             | 746.312 v8+H2O  | 1042.353 v8+H2O  | 1298.5069 MH+H2O |
| 130.0777 Y      | 484.1803 v4+H2O                                                                         | 747.2961 v8-NH3 | 1043.337 v8-NH3  | 1296.4909 MH-NH3 |
| 147.1128 Y1     | 485.1643 v4-NH3                                                                         | 764.3226 v6     | 1052.365 a8      | 1313.5174 MH     |

**MS-Product in ProteinProspector 5.10.6 Basic**

© Cowart 1996-2012 The Regents of the University of California.
